# Supplementary material
Source: PubMed Central journal article supplement (PMC218728)
Supplement: pnas_1934839100_1.pdf [file pnas_1934839100_1.pdf]

**Table 1. siRNA and shRNA sequences and annotations**

**siRNA Sequences and Annotation**

| <u>Annotation</u>                                                                                       | <u>Accession</u> | <u>Target start</u> | <u>19-mer sequence</u>  | <u>Alternative name</u> | <u>Sequence</u>              | <u>Possible Off-target Genes</u>                                                                                                                                                                                                                              |
|---------------------------------------------------------------------------------------------------------|------------------|---------------------|-------------------------|-------------------------|------------------------------|---------------------------------------------------------------------------------------------------------------------------------------------------------------------------------------------------------------------------------------------------------------|
| PGL2 (luciferase)                                                                                       | CONTROL          |                     | CGTACGCGGAATACT<br>TCGA |                         | AACGTACGCGGAAT<br>ACTTCGATT  | none detected                                                                                                                                                                                                                                                 |
| SCRAMBLE                                                                                                | CONTROL          |                     | GCTCAGTACGATCGA<br>ATCA |                         | AAGCTCAGTACGATC<br>GAATCA TT | none detected                                                                                                                                                                                                                                                 |
| H.s. mitogen-activated protein kinase kinase 7 (MAP3K7), mRNA                                           | NM_003188        | 527                 | TATTGTAGAGCTTCGG<br>CAG | TAK1                    | AATATTGTAGAGCTT<br>CGGCAGTT  | OAZ (NM_015069)                                                                                                                                                                                                                                               |
| H.s PTK2 protein tyrosine kinase 2 (PTK2), mRNA                                                         | NM_153831        | 1851                | AGATTTGTACACAGG<br>GACA | FAK                     | AAAGATTTGTACACA<br>GGGACATT  | CTEN(NM_032865)                                                                                                                                                                                                                                               |
| MAPK9: mitogen-activated protein kinase 9                                                               | NM_002752        | 722                 | TTCCAAGGCACTGAC<br>CATA | JNK2                    | AATTCCAAGGCACTG<br>ACCATATT  | LRP6(NM_002336), MRF2 (XM_084482), C14orf93 (NM_021944), ESR1(NM_000125)                                                                                                                                                                                      |
| H.s. lymphocyte-specific protein tyrosine kinase (LCK), mRNA                                            | NM_005356        | 1308                | CAAGTCAGATGTGTG<br>GTCT |                         | AACAAGTCAGATGTG<br>TGGTCTTT  | MET (NM_000245), ITK (NM_005546), P101-PI3K (NM_014308), LYN (NM_002350), PCDHGC5 (NM_018929)                                                                                                                                                                 |
| H.s v-abl Abelson murine leukemia viral oncogene homolog 2 (arg, Abelson-related gene) (ABL2), transcri | NM_005158        | 905                 | TGAAGGAAATCAAGC<br>ATCC | ARG                     | AATGAAGGAAATCAA<br>GCATCCTT  | RNPC6 (NM_153020), TRPC7 (NM_020389), LY6G5B (NM_021221), TMC2 (NM_080751), LSR7(NM_018559)                                                                                                                                                                   |
| H.s. protein kinase C, zeta (PRKCZ), mRNA                                                               | NM_002744        | 265                 | GAAGGCCTCATCATT<br>CATG |                         | AAGAAGGCCTCATC<br>ATTCATGTT  | hypothetical protein BC009489 (NM_138396), MYO1E (NM_004998), MLL5 (NM_018682)                                                                                                                                                                                |
| H.s. mitogen-activated protein kinase kinase kinase 4 (MAP4K4), mRNA                                    | NM_004834        | 347                 | GATGACCAACTCTGG<br>CTTG |                         | AAGATGACCAACTCT<br>GGCTTGTT  | hypothetical protein DKFZp434I2117 (NM_031478), Hypothetical protein LOC348761                                                                                                                                                                                |
| MAP3K1: mitogen-activated protein kinase kinase kinase 1                                                | XM_042066        | 2451                | CTGTTAGAAATGCTGA<br>GTG | MEKK1                   | AACTGTTAGAAATGC<br>TGAGTGTT  | HSA9761(NM_014473)                                                                                                                                                                                                                                            |
| H.s. v-src avian sarcoma (Schmidt-Ruppin A-2) viral oncogene homolog (SRC), mRNA                        | NM_005417        | 990                 | GAAGAAGCTGAGGCA<br>TGAG |                         | AAGAAGAAGCTGAG<br>GCATGAGTT  | ADCY4 (NM_139247), KIAA1922 protein(XM_057040), hypothetical protein MGC15631(NM_032753), FANCC (NM_000136), CICE (Hs.301002), KIAA0841protein (XM_049237),TGFB1(NM_000358), LOC339385(XM_290863), ERBB3 (NM_001982), LOC286167 (XM_212210), PHKB (NM_000293) |
| H.s mRNA for protein kinase C delta-type, complete cds                                                  | NM_006254        | 652                 | GAAATGCATCGACAA<br>GATC |                         | AAGAAATGCATCGAC<br>AAGATCTT  | MOCS1(NM_005942)                                                                                                                                                                                                                                              |
| H.s protein kinase, cAMP-dependent, catalytic, alpha (PRKACA), mRNA                                     | NM_002730        | 428                 | CTTATACATGGTCATG<br>GAG |                         | AACTTATACATGGTC<br>ATGGAGTT  | FLJ25818 (NM_173503), PRKACB (NM_002731), ESD (XM_166266)                                                                                                                                                                                                     |
| H.s. mitogen-activated protein kinase kinase kinase 1 (MAP4K1), mRNA                                    | NM_007181        | 312                 | ACTCTGGATCTGCAT<br>GGAA | HPK1                    | AAACTCTGGATCTGC<br>ATGGAATT  | SR-BP1 (NM_005866), KCNA2 (NM_004974)                                                                                                                                                                                                                         |
| H.s diacylglycerol kinase, iota (DGKI), mRNA                                                            | NM_004717        | 1890                | TAACTACTTCAGCCTT<br>GGA |                         | AATAACTACTTCAGC<br>CTTGATT   | FLJ12076 (NM_025187), RYK (NM_002958), DGKZ (NM_003646)                                                                                                                                                                                                       |
| Homo sapiens phosphoinositide-3-kinase, regulatory subunit, polypeptide 3 (p55, gamma) (PIK3R3), mRNA   | NM_003629        | 1577                | GCAAGAAAGGATGCT<br>ATGC |                         | AAGCAAGAAAGGAT<br>GCTATGCTT  | none detected                                                                                                                                                                                                                                                 |

|                                                                              |           |      |                         |       |                              |                                                                                                                              |
|------------------------------------------------------------------------------|-----------|------|-------------------------|-------|------------------------------|------------------------------------------------------------------------------------------------------------------------------|
| PIK3CD: phosphoinositide-3-kinase, catalytic, delta polypeptide              | NM_005026 | 2268 | ACTGAAGGCCCTGAA<br>TGAC |       | AAACTGAAGGCCCT<br>GAATGACTT  | STK10 (NM_005990),<br>PRDX5(NM_012094), PLCB2<br>(NM_004573), ANKRD5 (NM_022096),<br>ALDOB (NM_000035),<br>PFKFB1(NM_002625) |
| Homo sapiens mitogen-activated protein kinase kinase kinase 2 (MAP3K2), mRNA | NM_006609 | 1449 | TTAAAAGCATATGGCG<br>CTC | MEKK2 | AATTTAAAAGCATATG<br>GCGCTCTT | none detected                                                                                                                |
| H.s. v-raf-1 murine leukemia viral oncogene homolog 1 (RAF1),                | NM_002880 | 475  | ACTGATGCTGCGTCTT<br>TGA |       | AAACTGATGCTGCGT<br>CTTTGATT  | ANLN (NM_018685)                                                                                                             |

### shRNA Sequences and Annotations

| Annotation | Accession | Sense Oligo                                                                 | Antisense Oligo                                                          | Possible Off-target Genes                                                                                                                                                                                         |
|------------|-----------|-----------------------------------------------------------------------------|--------------------------------------------------------------------------|-------------------------------------------------------------------------------------------------------------------------------------------------------------------------------------------------------------------|
| CD29       | NM_002211 | aagCTTTCCCGGTAGAAAGTCGGGACAAAT<br>TcaagagaAATTTGTCCCGACTTTCTACcttctc<br>gag | CtcgagaaaGGTAGAAAGTCGGGACAAATTc<br>CCCgACTTTCTACCGGGAAAGcct              | none detected                                                                                                                                                                                                     |
| TERE1      | NM_013319 | agctttcccTGTGATTTGGCAGTCAGGGTAttcaa<br>gagaTACCCTGACTGCCAAATCACAtttttc      | TcgagaaaaTGTGATTTGGCAGTCAGGGT<br>AtctctgaaTACCCTGACTGCCAAATCAC<br>gggaa  | ELD/OSA1(NM_020732), DMBT1 (NM_004406),                                                                                                                                                                           |
| BLK        | NM_001715 | agctttcccCAACATGAAGGTGGCCATTAAttcaa<br>gagaTTAATGGCCACCTTCATGTTGtttttc      | TcgagaaaaCAACATGAAGGTGGCCATTA<br>AtctctgaaTTAATGGCCACCTTCATGTTG<br>gggaa | PPP1R13B(NM_015316), ADAMTS6 (NM_014273), HYOU1<br>(NM_006389), SLC38A2(NM_018976), BA11(NM_001702),<br>STAU (NM_004602), ZDHHC5(XM_290511), LOC283270<br>(XM_210956), KIAA0540 (XM_291064), FPRL1<br>(NM_001462) |

Sequences for small inhibitory RNAs (siRNAs) and short-hairpin RNAs (shRNAs) used in this study are shown, along with targeted genes and corresponding accession numbers. All siRNAs utilized, with the exception of those targeting MAP3K7 and PTK2, demonstrated knockdown of signal induced by at least one AP-1 modulator (see Fig. 3A) and were assumed to be functional. The siRNAs corresponding to MAP3K7 and PTK2 have previously been shown to abrogate tumor necrosis factor (TNF)  $\alpha$ -induced NF $\kappa$ B signaling and enhance TRAIL-mediated apoptosis, respectively (P. Aza-Blanc, personal communication). These activities are consistent with reported loss-of-function phenotypes associated with these molecules (1, 2) and thus suggest that these siRNAs are also functional. Finally, mRNAs that are potentially affected by off-target si/shRNA activities were determined by Smith–Waterman similarity searches against a Unigene database (Uniq-1-2EST Human v.160). Genes (as annotated by LOCUSLINK) with 10 or more contiguous base-pairs of identity to the targeting (si/shRNA) sequence are shown.

1. Funakoshi-Tago, M., Sonoda, Y., Tanaka, S., Hashimoto, K., Tago, K., Tominaga, S. & Kasahara, T. (2003) *J. Biol. Chem.* **278**, 29359–29365.
2. Sanna, M. G., da Silva Correia, J., Ducrey, O., Lee, J., Nomoto, K., Schrantz, N., Deveraux, Q. L. & Ulevitch, R. J. (2002) *Mol. Cell. Biol.* **22**, 1754–1766.
