# Supplementary material
Source: PubMed Central journal article supplement (PMC218728)
Supplement: pnas_1934839100_2.pdf [file pnas_1934839100_2.pdf]

**Table 2. Frequency distributions of GFAcT analyses**

| <b>AP-1</b>     |           | <b>Epo</b>      |           | <b>p53</b>      |           |
|-----------------|-----------|-----------------|-----------|-----------------|-----------|
| Fold Activation | Frequency | Fold Activation | Frequency | Fold Activation | Frequency |
| 0               | 0         | 0               | 0         | 0               | 0         |
| 0.3             | 673       | 0.5             | 1797      | 0.5             | 2622      |
| 0.6             | 1980      | 1               | 9773      | 1               | 6525      |
| 0.9             | 5137      | 1.5             | 7371      | 1.5             | 5725      |
| 1.2             | 6477      | 2               | 2048      | 2               | 1286      |
| 1.5             | 3638      | 2.5             | 530       | 2.5             | 168       |
| 1.8             | 1944      | 3               | 203       | 3               | 30        |
| 2.1             | 950       | 3.5             | 91        | 3.5             | 16        |
| 2.4             | 507       | 4               | 32        | 4               | 4         |
| 2.7             | 250       | 4.5             | 16        | 4.5             | 4         |
| 3               | 132       | 5               | 7         | 5               | 0         |
| 3.3             | 67        | 5.5             | 8         | 5.5             | 0         |
| 3.6             | 41        | 6               | 4         | 6               | 1         |
| 3.9             | 28        | 6.5             | 3         | 6.5             | 0         |
| 4.2             | 16        | 7               | 1         | 7               | 1         |
| 4.5             | 9         | 7.5             | 0         | 7.5             | 0         |
| 4.8             | 7         | 8               | 0         | >8              | 1         |
| 5.1             | 7         | 8.5             | 1         |                 |           |
| 5.4             | 1         | 9               | 0         |                 |           |
| 5.7             | 6         | 9.5             | 1         |                 |           |
| >6              | 18        | 10              | 0         |                 |           |
|                 |           | 10.5            | 0         |                 |           |
|                 |           | 11              | 0         |                 |           |
|                 |           | 11.5            | 0         |                 |           |
|                 |           | >12             | 2         |                 |           |

Distribution data utilized to construct Fig. 1B are shown for respective assays. Luciferase readings from each interrogated 384-well plate were normalized to an arbitrary value of 1, and gene activities were determined through the average of two experiments. Fold activation indicates relative induction over experimental mean.
