# Supplementary material
Source: PubMed Central journal article supplement (PMC218728)
Supplement: pnas_1934839100_3.pdf [file pnas_1934839100_3.pdf]

**Table 3. Annotation and activities of AP-1 modulators**

| Fold Induction | Seq. Confirm | Gene name          | Match annotation                                                                                                                                     |
|----------------|--------------|--------------------|------------------------------------------------------------------------------------------------------------------------------------------------------|
| 44.8           | Y            | <b>UBB</b>         | gb BC026301.1  Homo sapiens, clone MGC:24729 IMAGE:4280629, mRNA, complete cds                                                                       |
| 185.3          | Y            | <b>FOS</b>         | ref NM_005252.2  Homo sapiens v-fos FBJ murine osteosarcoma viral oncogene homolog (FOS), mRNA                                                       |
| 190.2          | Y            | <b>GADD45G</b>     | ref NM_006705.2  Homo sapiens growth arrest and DNA-damage-inducible, gamma (GADD45G), mRNA.                                                         |
| 81.9           | Y            | <b>JUN</b>         | ref XM_001472.4  Homo sapiens v-jun sarcoma virus 17 oncogene                                                                                        |
| 189.0          | Y            | <b>SPOP</b>        | gb BC001269.1 BC001269 Homo sapiens, speckle-type POZ protein, clone MGC:5068 IMAGE:3461565, mRNA, complete cds                                      |
| 15.7           | Y            | <b>LEPROTL1</b>    | ref XM_011695.6  Homo sapiens leptin receptor overlapping transcript-like 1 (LEPROTL1), mRNA                                                         |
| 54.8           | Y            | <b>FGR</b>         | gb BC002836.1 BC002836 Homo sapiens, Gardner-Rasheed feline sarcoma viral (v-fgr) oncogene homolog, clone MGC:3553 IMAGE:3634465, mRNA, complete cds |
| 16.5           | Y            | <b>Unannotated</b> | emb AL445237.16 AL445237 Human DNA sequence from clone RP13-238F13 on chromosome 10, complete sequence [Homo sapiens]                                |
| 56.1           | Y            | <b>MID2</b>        | ref NM_012216.2  Homo sapiens midline 2 (MID2), transcript variant 1, mRNA.                                                                          |
| 78.8           | Y            | <b>TRAF6</b>       | ref NM_004620.1  Homo sapiens TNF receptor-associated factor 6 (TRAF6), mRNA                                                                         |
| 42.3           | Y            | <b>ZNT5</b>        | gb AF461760.1  Homo sapiens zinc transporter 5 (ZNT5) mRNA,...                                                                                       |
| 73.5           | Y            | <b>C6orf5</b>      | ref XM_165674.1  Homo sapiens chromosome 6 open reading frame 5 (C6orf5), mRNA                                                                       |
| 10.5           | Y            | <b>SNCA</b>        | ref NM_000345.2  Homo sapiens synuclein, alpha (non A4 component of amyloid precursor) (SNCA), transcript variant NACP140, mRNA                      |
| 7.45           | Y            | <b>Unannotated</b> | gb BC018708.1 BC018708 Homo sapiens, hypothetical protein FLJ14451, clone MGC:31767 IMAGE:4111500, mRNA, complete cds                                |
| 12.1           | Y            | <b>SSR2</b>        | emb X74104.1 HSSSR H.sapiens mRNA for TRAP beta subunit                                                                                              |
| 27.8           | Y            | <b>FASTK</b>       | ref NM_033015.1  Homo sapiens FAST kinase (FASTK) transcript variant 2, mRNA                                                                         |
| 65.3           | Y            | <b>Unannotated</b> | dbj AK027878.1 AK027878 Homo sapiens cDNA FLJ14972 fis, clone THYRO1000715                                                                           |
| 59.6           | Y            | <b>CENTA1</b>      | ref NM_006869  Homo sapiens centaurin, alpha 1 (CENTA1), mRNA.                                                                                       |
| 86.4           | Y            | <b>RICK</b>        | gb AF027706.1 AF027706 Homo sapiens serine/threonine kinase RICK (RICK) mRNA, complete cds                                                           |
| 19.5           | Y            | <b>Unannotated</b> | ref XM_035634.2  Homo sapiens hypothetical protein, clone 24751 (CL24751), mRNA                                                                      |
| 183.0          | Y            | <b>BLK</b>         | ref XM_034315.1  Homo sapiens B lymphoid tyrosine kinase (BLK), mRNA                                                                                 |
| 418.5          | Y            | <b>TYRO3</b>       | ref NM_006293  Homo sapiens TYRO3 protein tyrosine kinase (TYRO3), mRNA.                                                                             |
| 18.0           | Y            | <b>Unannotated</b> | gb AF173157.1 AF173157 Homo sapiens MSTP098 (MST098) mRNA                                                                                            |
| 31.1           | Y            | <b>Unannotated</b> | dbj AK074258.1  Homo sapiens cDNA FLJ23678 fis, clone HEP08720                                                                                       |
| 57.5           | Y            | <b>TERE1</b>       | ref NM_013319.1  Homo sapiens transitional epithelia response protein (TERE1), mRNA                                                                  |
| 16.2           | Y            | <b>INPP1</b>       | ref XM_002279.6  Homo sapiens inositol polyphosphate-1-phosphatase (INPP1), mRNA                                                                     |
| 54.9           | Y            | <b>HGS</b>         | gb BC003565.1 BC003565 Homo sapiens, hepatocyte growth factor-regulated tyrosine kinase substrate, clone MGC:2045 IMAGE:3544197, mRNA, complete cds  |
| 422.7          | Y            | <b>ERBB2</b>       | emb X03363.1 HSERB2R Human c-erb-B-2 mRNA                                                                                                            |
| 15.3           | Y            | <b>SNX3</b>        | gb BC016863.1 BC016863 Homo sapiens, Similar to sorting nexin 3, clone MGC:17570 IMAGE:3846511, mRNA, complete cds                                   |
| 28.8           | Y            | <b>RBM4</b>        | ref NM_002896.1  Homo sapiens RNA binding motif protein 4 (RBM4), mRNA                                                                               |
| 42.2           | Y            | <b>NTKL</b>        | ref XM_166235.1  Homo sapiens N-terminal kinase-like (NTKL), mRNA                                                                                    |
| 29.6           | Y            | <b>Unannotated</b> | gb BC017168.1 BC017168 Homo sapiens, clone MGC:9517 IMAGE:3907072, mRNA, complete cds                                                                |
| 38.8           | Y            | <b>ITGA7</b>       | emb AJ228839.1 HSAJ8839 Homo sapiens ITGA7 gene, exon 4                                                                                              |
| 105.3          | Y            | <b>FOSL1</b>       | gb BC016648.1 BC016648 Homo sapiens, FOS-like antigen-1, clone MGC:9264 IMAGE:3925241, mRNA, complete cds                                            |
| 361.5          | Y            | <b>MAP3K11</b>     | gb BC011263.1 BC011263 Homo sapiens, Similar to mitogen-activated protein kinase kinase kinase 11, clone MGC:17114 IMAGE:4215281, mRNA, complete cds |
| 220.1          | Y            | <b>P2RY2</b>       | gb BC028135.1  Homo sapiens, purinergic receptor P2Y, G-protein coupled, 2, clone MGC:40010 IMAGE:5215817, mRNA, complete cds                        |
| 10.7           | Y            | <b>Unannotated</b> | gb BC022023.1 BC022023 Homo sapiens, Similar to hypothetical protein DKFp434A171, clone IMAGE:4824658, mRNA                                          |

|      |   |                    |                                                                                                                                                                  |
|------|---|--------------------|------------------------------------------------------------------------------------------------------------------------------------------------------------------|
| 20.1 | Y | <b>Unannotated</b> | gb BC016958.1 BC016958 Homo sapiens, hypothetical protein DKFZp761H1710, clone MGC:21544 IMAGE:4151712, mRNA, complete cds                                       |
| 11.5 | Y | <b>GRO2</b>        | ref XM_003510.4  Homo sapiens GRO2 oncogene (GRO2),                                                                                                              |
| 9.5  | Y | <b>Unannotated</b> | ref XM_042224.2  Homo sapiens hypothetical protein FLJ11151 (FLJ11151), mRNA                                                                                     |
| 10.0 | Y | <b>TGT</b>         | ref NM_031209.1  Homo sapiens tRNA-guanine transglycosylase (TGT), mRNA                                                                                          |
| 18.0 | Y | <b>Unannotated</b> | gb AF090916.1 AF090916 Homo sapiens clone HQ0312                                                                                                                 |
| 15.4 | Y | <b>SNRPN</b>       | gb BC025178.1  Homo sapiens, small nuclear ribonucleoprotein polypeptide N, clone MGC:34180 IMAGE:4158469, mRNA, complete cds                                    |
| 24.6 | N |                    |                                                                                                                                                                  |
| 65.6 | Y | <b>LRG</b>         | ref NM_052972.1  Homo sapiens leucine-rich alpha-2-glycoprotein (LRG), mRNA                                                                                      |
| 30.7 | N |                    |                                                                                                                                                                  |
| 37.2 | N |                    |                                                                                                                                                                  |
| 28.3 | Y | <b>Unannotated</b> | gb AC007026.3 AC007026 Homo sapiens PAC clone RP4-751G11 from 7q31-q32, complete sequence                                                                        |
| 17.6 | Y | <b>PILRb</b>       | dbj AK056412.1 AK056412 Homo sapiens cDNA FLJ31850 fis, clone NT2RP7000600, highly similar to Homo sapiens activating receptor PILRbeta mRNA                     |
| 14.0 | N |                    |                                                                                                                                                                  |
| 10.5 | Y | <b>G6PT1</b>       | gb AF110821.1 AF110821 Homo sapiens glucose-6-phosphate translocase mRNA, sequence                                                                               |
| 12.4 | Y | <b>CTSB</b>        | ref XM_035662.2  Homo sapiens cathepsin B (CTSB), mRNA                                                                                                           |
| 11.3 | Y | <b>PRKCZ</b>       | ref XM_049769.4  Homo sapiens protein kinase C, zeta (PRKCZ), mRNA                                                                                               |
| 11.6 | Y | <b>EPC1</b>        | gb AF277374.1 AF277374 Homo sapiens enhancer of polycomb mRNA, complete cds                                                                                      |
| 20.0 | N |                    |                                                                                                                                                                  |
| 79.7 | Y | <b>GADD45B</b>     | ref XM_030485.3  Homo sapiens growth arrest and DNA-damage-inducible, beta (GADD45B), mRNA                                                                       |
| 66.3 | Y | <b>PECI</b>        | ref NM_006117.1  Homo sapiens peroxisomal D3,D2-enoyl-CoA isomerase (PECI), mRNA                                                                                 |
| 86.7 | Y | <b>NR2F2</b>       | gb BC014664.1 BC014664 Homo sapiens, nuclear receptor subfamily 2, group F, member 2, clone MGC:23125 IMAGE:4849984, mRNA, complete cds                          |
| 19.3 | Y | <b>Unannotated</b> | gb AC023154.5  Homo sapiens chromosome 4 clone RP11-752D24, complete sequence                                                                                    |
| 19.8 | Y | <b>ATF3</b>        | ref NM_001674.1  Homo sapiens activating transcription factor 3 (ATF3), mRNA                                                                                     |
| 75.4 | Y | <b>FN1</b>         | gb U42594.1 HSU42594 Human fibronectin (FN1) mRNA, splice variant, partial cds                                                                                   |
| 14.7 | N |                    | gb AC008243.6 AC008243 Homo sapiens, clone RP11-45L9, complete sequence                                                                                          |
| 16.1 | N |                    | gb AC012047.8  Homo sapiens chromosome 10 clone RP11-423F10, complete sequence                                                                                   |
| 14.2 | Y | <b>HES1</b>        | ref XM_039925.4  Homo sapiens hairy homolog (Drosophila) (HRY), mRNA                                                                                             |
| 43.8 | Y | <b>COL1A1</b>      | ref XM_012651.5  Homo sapiens collagen, type I, alpha 1                                                                                                          |
| 23.1 | Y | <b>Unannotated</b> | dbj AK021623.1 AK021623 Homo sapiens cDNA FLJ11561 fis, clone HEMBA1003142                                                                                       |
| 16.6 | N |                    |                                                                                                                                                                  |
| 27.4 | N |                    |                                                                                                                                                                  |
| 47.1 | N |                    |                                                                                                                                                                  |
| 64.6 | N |                    |                                                                                                                                                                  |
| 83.5 | Y | <b>KDEL3</b>       | gb BC001277.1 BC001277 Homo sapiens, KDEL (Lys-Asp-Glu-Leu) endoplasmic reticulum protein retention receptor 3, clone MGC:5099 IMAGE:3462392, mRNA, complete cds |
| 44.0 | N |                    |                                                                                                                                                                  |
| 86.3 | Y | <b>ABHD2</b>       | ref NM_007011 Homo sapiens abhydrolase domain containing 2 (ABHD2), mRNA.                                                                                        |

The activities of the top 0.3% of nonredundant AP-1 activators identified through GFAcT analysis were reconfirmed in 96-well transient transfection assays. Relative induction of AP-1(PMA) luciferase construct as a function of parental control (pTAL-luciferase) vector activation is reported as fold induction. Gene names, descriptions, and accession numbers are also provided. Where applicable, genes that encode hypothetical proteins and predicted proteins and genes without previously predicted ORFs are designated as unannotated. Sequences for a majority of cDNAs shown were manually confirmed, as indicated.
