# Supplementary material
Source: PubMed Central journal article supplement (PMC218728)
Supplement: pnas_1934839100_4.pdf [file pnas_1934839100_4.pdf]

**Table 4. Specificity analysis of AP-1 activators**

| AP1  | p53 | Epo | Accession     | Annotation                                                                                                                   |
|------|-----|-----|---------------|------------------------------------------------------------------------------------------------------------------------------|
| 2.7  | 0.2 | 0.6 | gb BC028135   | Homo sapiens, purinergic receptor P2Y, G-protein coupled, 2, clone MGC:40010 IMAGE:5215817, mRNA, complete cds               |
| 1.74 | 0.4 | 0.6 | ref NM_006293 | Homo sapiens TYRO3 protein tyrosine kinase (TYRO3), mRNA.                                                                    |
| 9.2  | 0.1 | 0.2 | ref XM_035634 | Homo sapiens hypothetical protein, clone 24751 (CL24751), mRNA                                                               |
| 3.9  | 0.9 | 0.4 | ref NM_013319 | Homo sapiens transitional epithelia response protein (TERE1), mRNA                                                           |
| 2.12 | 0.8 | 0.6 | gb BC001277   | Homo sapiens, KDEL (Lys-Asp-Glu-Leu) endoplasmic reticulum protein                                                           |
| 2.0  | 1.1 | 0.6 | gb BC031027   | Homo sapiens, clone MGC:32826 IMAGE:4715377, mRNA, complete cds                                                              |
| 5.8  | 1   | 0.6 | ref XM_001640 | Homo sapiens Gardner-Rasheed feline sarcoma viral (v-fgr) oncogene homolog (FGR), mRNA                                       |
| 15   | 1.5 | 0.9 | ref XM_001640 | Homo sapiens Gardner-Rasheed feline sarcoma viral (v-fgr) oncogene homolog (FGR), mRNA                                       |
| 14.1 | 1.6 | 1   | ref NM_004620 | Homo sapiens TNF receptor-associated factor 6 (TRAF6), mRNA                                                                  |
| 12.9 | 0.6 | 1   | ref NM_002206 | Homo sapiens integrin, alpha 7 (ITGA7), mRNA.                                                                                |
| 6.7  | 0.6 | 1.2 | ref XM_034315 | Homo sapiens B lymphoid tyrosine kinase (BLK), mRNA                                                                          |
| 30   | 0.8 | 1   | gb U42594     | Human fibronectin (FN1) mRNA, splice variant, partial cds                                                                    |
| 18.5 | 1   | 1.1 | gb U42594     | Human fibronectin (FN1) mRNA, splice variant, partial cds                                                                    |
| 10.9 | 1   | 0.6 | ref NM_005252 | Homo sapiens v-fos FBJ murine osteosarcoma viral oncogene homolog (FOS), mRNA                                                |
| 47.4 | 0.8 | 0.5 | dbj AK027878  | Homo sapiens cDNA FLJ14972 fis, clone THYRO1000715                                                                           |
| 14.9 | 1   | 0.6 | gb BC001269   | Homo sapiens, speckle-type POZ protein, clone MGC:5068 IMAGE:3461565, mRNA, complete cds                                     |
| 8.6  | 1   | 1   | ref NM_000061 | Homo sapiens Bruton agammaglobulinemia tyrosine kinase (BTK), mRNA.                                                          |
| 10.2 | 1   | 0.8 | ref XM_092768 | 1  Homo sapiens similar to dJ545L17                                                                                          |
| 5.6  | 0.8 | 0.9 | ref XM_012651 | Homo sapiens collagen, type I, alpha 1 (CO                                                                                   |
| 35   | 0.5 | 0.6 | gb AF027706   | Homo sapiens serine/threonine kinase RICK (RICK) mRNA, complete cds                                                          |
| 107  | 0.3 | 0.5 | ref NM_006705 | Homo sapiens growth arrest and DNA-damage-inducible, gamma (GADD45G), mRNA.                                                  |
| 26   | 0.3 | 0.6 | gb BC003565   | Homo sapiens, hepatocyte growth factor-regulated tyrosine kinase substrate, clone MGC:2045 IMAGE:3544197, mRNA, complete cds |
| 4.5  | 0.4 | 1.4 | ref NM_006869 | Homo sapiens centaurin, alpha 1 (CENTA1), mRNA.                                                                              |
| 5.4  | 0.6 | 1.3 | ref XM_012651 | Homo sapiens collagen, type I, alpha 1                                                                                       |
| 15.8 | 0.2 | 1.1 | ref XM_001472 | Homo sapiens v-jun sarcoma virus 17 oncogene                                                                                 |
| 6.6  | 0.1 | 0.7 | gb BC014664   | Homo sapiens, nuclear receptor subfamily 2, group F, member 2, clone MGC:23125 IMAGE:4849984, mRNA, complete cds             |
| 12.3 | 0.1 | 0.9 | ref NM_006117 | Homo sapiens peroxisomal D3,D2-enoyl-CoA isomerase (PECI), mRNA                                                              |
| 1.6  | 0.2 | 1.1 | ref NM_007011 | Homo sapiens abhydrolase domain containing 2 (ABHD2), mRNA.                                                                  |
| 1.7  | 0.6 | 1.1 | dbj AK021623  | Homo sapiens cDNA FLJ11561 fis, clone HEMBA1003142                                                                           |

Identities of AP-1-specific genes depicted in Fig. 1C are listed corresponding to their clustered order (top to bottom). Relative inductions of each gene were normalized to parental control (pTAL-luciferase) vector activity and values derived from cotransfection of a negative control plasmid

(pCMV-GFP) with appropriate pathway reporter [AP-1(PMA)-luciferase, p53-luciferase, epoluciferase]. Values of each gene in the AP-1 cluster are listed (in arbitrary units) in the first three columns by indicated screen.
