# Supplementary material
Source: PubMed Central journal article supplement (PMC218728)
Supplement: pnas_1934839100_5.pdf [file pnas_1934839100_5.pdf]

**Table 5. AP-1 effector pathway mapping**

| Symbol         | Gene name/(interim name)                                                  | Accession | CRE | AP1 | ISRE | NFAT | SRE | AP1PMA |
|----------------|---------------------------------------------------------------------------|-----------|-----|-----|------|------|-----|--------|
| <b>Centa1</b>  | centaurin, alpha 1                                                        | NM_006869 | 4.5 | 5.4 | 5    | 13.2 | 6.2 | 11.3   |
| <b>Blk</b>     | B lymphoid tyrosine kinase                                                | NM_001715 | 5.1 | 2.6 | 5.1  | 9.1  | 6.8 | 15.0   |
| <b>Trif</b>    | TIR domain containing adaptor inducing interferon-beta                    | XM_035634 | 2.9 | 1.8 | 12   | 9.1  | 5.9 | 12.1   |
| <b>Tyro3</b>   | Homo sapiens TYRO3 protein tyrosine kinase (TYRO3), mRNA.                 | NM_006293 | 5.4 | 2.4 | 4.5  | 14.7 | 5.8 | 10.5   |
| <b>Tere1</b>   | transitional epithelia response protein                                   | NM_013319 | 8.3 | 6.5 | 5.1  | 9.5  | 7.9 | 11.1   |
| <b>Tiap</b>    | KIAA1847/(Tudor domain containing inducer of AP-1)                        | NM_032527 | 8   | 5.7 | 3.1  | 8.2  | 6.9 | 13.9   |
| <b>P2ry2</b>   | purinergic receptor P2Y, G-protein coupled, 2                             | NM_002564 | 7.9 | 6.1 | 3.7  | 13.9 | 9.4 | 4.8    |
| <b>Ubb</b>     | ubiquitin B                                                               | NM_018955 | 8.3 | 9.8 | 3.2  | 6.3  | 14  | 2.0    |
| <b>Nr2f2</b>   | nuclear receptor subfamily 2, group F, member 2                           | NM_021005 | 7.7 | 7.5 | 1.6  | 9.6  | 11  | 8.6    |
| <b>Peci</b>    | peroxisomal D3,D2-enoyl-CoA isomerase                                     | NM_006117 | 6.7 | 6.9 | 2.6  | 8.1  | 11  | 11.0   |
| <b>Fgr</b>     | Gardner-Rasheed feline sarcoma viral (v-fgr) oncogene homolog             | NM_005248 | 8.3 | 7.3 | 7.3  | 6.2  | 11  | 9.5    |
| <b>Hgs</b>     | hepatocyte growth factor-regulated tyrosine kinase substrate              | NM_004712 | 7.5 | 9   | 6.1  | 5.6  | 9.1 | 11.2   |
| <b>Fn1</b>     | fibronectin 1                                                             | NM_002026 | 8.6 | 9.2 | 8.9  | 3.2  | 6.6 | 11.2   |
| <b>RAD21L1</b> | Novel protein similar to RAD21 homolog(S. pombe)                          | NA        | 9.7 | 10  | 4.8  | 5.1  | 8.1 | 9.9    |
| <b>Spop</b>    | speckle-type POZ protein                                                  | NM_003563 | 7.7 | 6.9 | 1.8  | 2.6  | 6.2 | 16.1   |
| <b>Abhd2</b>   | abhydrolase domain containing 2                                           | NM_007011 | 5.3 | 5.7 | 17   | 4.3  | 5.5 | 4.5    |
| <b>Maps3</b>   | Homo sapiens cDNA FLJ11561 fis, clone HEMBA1003142/(Modulator of AP-1, 3) | AK021623  | 8.6 | 8.3 | 13   | 4.9  | 9.4 | 1.4    |
| <b>Snrpn</b>   | small nuclear ribonucleoprotein polypeptide N                             | NM_003097 | 6.8 | 8.6 | 15   | 5.8  | 7.1 | 2.4    |
| <b>SCYL1</b>   | SCY1-like 1 (S. cerevisiae)                                               | NM_020680 | 7.3 | 6.9 | 17   | 4.1  | 5.5 | 1.1    |
| <b>Col1A1</b>  | collagen, type I, alpha 1                                                 | NM_000088 | 9.6 | 7.1 | 7.6  | 10.7 | 9.5 | 3.7652 |
| <b>HES1</b>    | hairy and enhancer of split 1, (Drosophila)                               | NM_005524 | 5.4 | 18  | 6.7  | 2.07 | 2.8 | 1.3824 |
| <b>Maps4</b>   | hypothetical protein DKFZp547E052/(Modulator of AP-1, 4)                  | NM_032276 | 8.1 | 14  | 5    | 7.05 | 6.8 | 4.779  |
| <b>FastK</b>   | FAST kinase                                                               | NM_006712 | 9.5 | 11  | 3.9  | 11.2 | 7.9 | 3.9357 |
| <b>Kdelr3</b>  | KDEL (Lys-Asp-Glu-Leu) endoplasmic reticulum protein retention receptor 3 | NM_006855 | 10  | 7.7 | 6.8  | 8.28 | 9   | 7.641  |
| <b>Pirb</b>    | paired immunoglobulin-like receptor beta                                  | NM_175047 | 13  | 11  | 6    | 7.17 | 7.4 | 2.5592 |

Gene annotations and accession numbers from cDNAs reported in Fig. 2A are shown. Hypothetical and predicted encoded proteins were given interim names, indicated in parentheses. Normalized relative activities of these cDNAs (in arbitrary units) across AP-1-related reporters used for cluster analysis are also delineated.
