# Supplementary material
Source: PubMed Central journal article supplement (PMC218728)
Supplement: pnas_1934839100_9.pdf [file pnas_1934839100_9.pdf]

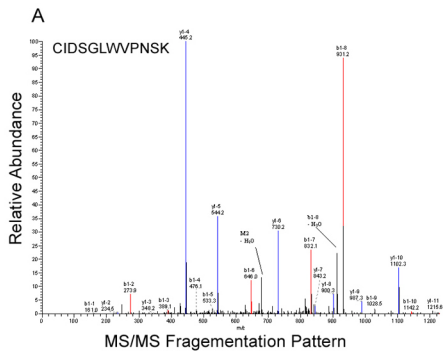

Legend: **Peptide Sequence**      **Ion**   **XC**      **Delta Cn**

## Blk-Interacting Proteins

A) gi|5901922|ref|NP\_008996.1| (NM\_007065) CDC37 cell division cycle 37 homolog (S. cerevisiae)

|         |                     |   |       |       |
|---------|---------------------|---|-------|-------|
| Shown:  | <b>CIDSGLWVPNSK</b> | 2 | 3.308 | 0.3   |
| Others: | <b>LQAEAQLR</b>     | 2 | 3.199 | 0.196 |

B) gi|4502203|ref|NP\_001650.1| (NM\_001659) ADP-ribosylation factor 3

NOTE: Could be ARF 2,3,4...

|         |                    |   |       |       |
|---------|--------------------|---|-------|-------|
| Shown:  | <b>DAVLLVFANK</b>  | 2 | 3.842 | 0.353 |
| Others: | <b>ILMVGLDAAGK</b> | 2 | 2.916 | 0.272 |

C) gi|4557797|ref|NP\_000260.1| (NM\_000269) non-metastatic cells 1, protein (NM23A)

|         |                   |   |       |       |
|---------|-------------------|---|-------|-------|
| Shown:  | <b>GDFCIQVGR</b>  | 2 | 3.086 | 0.292 |
| Others: | <b>DRPFFAGLVK</b> | 2 | 2.494 | 0.233 |

## Tere1- Interacting Proteins

D) gi|23308577|ref|NP\_006614.2| phosphoglycerate dehydrogenase

|         |                      |   |       |       |
|---------|----------------------|---|-------|-------|
| Shown:  | <b>GGIVDEGALLR</b>   | 2 | 4.15  | 0.202 |
| Others: | <b>GTIQVITQGTSLK</b> | 2 | 4.233 | 0.404 |
|         | <b>ILQDGGLQVVEK</b>  | 2 | 4.027 | 0.279 |
|         | <b>TLGIIGLGR</b>     | 2 | 2.705 | 0.135 |
|         | <b>DLPLLLFR</b>      | 2 | 2.473 | 0.085 |

E) gi|4757810|ref|NP\_004037.1| ATP synthase, H<sup>+</sup> transporting, mitochondrial F1 complex, alpha subunit, isoform 1, cardiac muscle

|         |                        |   |       |       |
|---------|------------------------|---|-------|-------|
| Shown:  | <b>TSIAIDIINQK</b>     | 2 | 4.757 | 0.28  |
| Others: | <b>VVDALGNAIDGK</b>    | 2 | 3.906 | 0.375 |
|         | <b>VLSIGDGIAR</b>      | 2 | 2.673 | 0.209 |
|         | <b>ILGADTSVDLEETGR</b> | 2 | 5.069 | 0.386 |
|         | <b>HALIYDDLSK</b>      | 2 | 3.736 | 0.333 |
